# Supplementary material
Source: PubMed Central journal article supplement (PMC3680915)
Supplement: bi3016873_si_001.pdf [file bi3016873_si_001.pdf]

**Figure S1**

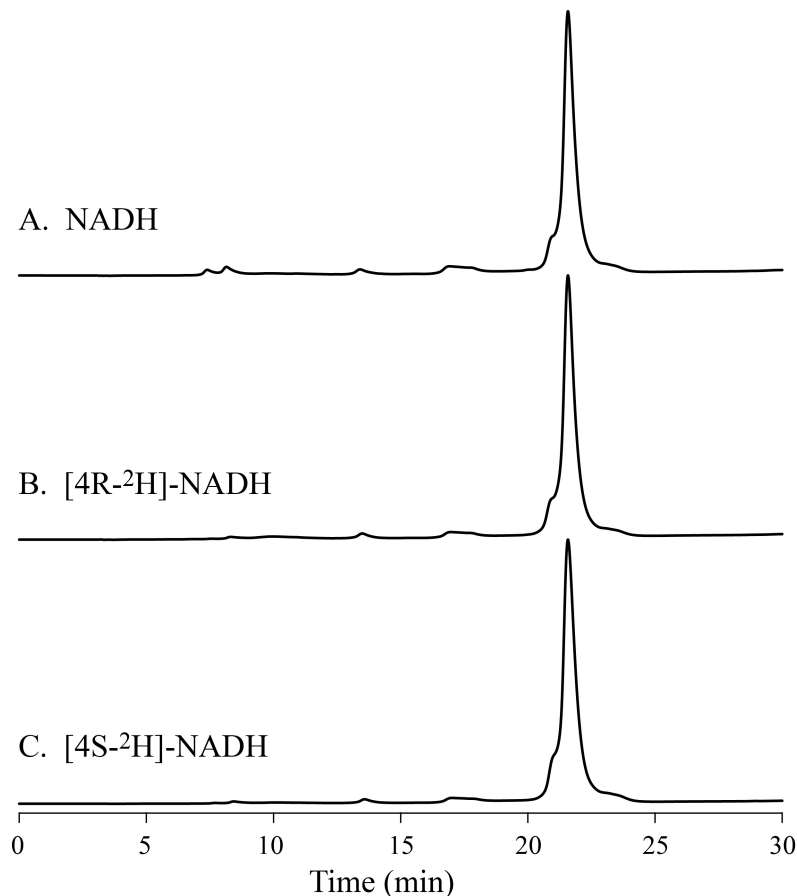

**HPLC analyses of NADH, [4R-<sup>2</sup>H]-NADH and [4S-<sup>2</sup>H]-NADH.** The 260 nm absorbance traces are shown for the elution of nucleotides from a 5  $\mu\text{m}$  Nucleosil C18 column (250 mm x 3.2 mm). Conditions: injection volume 20  $\mu\text{L}$ , 0.5  $\text{mL min}^{-1}$  flow rate, 0.1 M potassium phosphate (pH 6) containing 8 mM tetrabutylammonium hydrogen sulfate with a gradient of 20 to 40% methanol in 12 min, 40 to 100% methanol in an additional 16 min, then held at 100% methanol (1, 2). The samples are A) NADH (produced from  $\text{NAD}^+$  by glucose dehydrogenase in the presence of glucose, followed by purification by ion exchange chromatography on Q sepharose and desalting using Sephadex G-10); B) [4R-<sup>2</sup>H]-NADH (produced from  $\text{NAD}^+$  by horse liver alcohol dehydrogenase in the presence of 2-propanol- $\text{d}_8$ , followed by purification by ion exchange chromatography on Q sepharose and desalting using Sephadex G-10) and C) [4S-<sup>2</sup>H]-NADH (produced from  $\text{NAD}^+$  by glucose dehydrogenase in the presence of glucose- $\text{d}_1$ , followed by purification by ion exchange chromatography on Q sepharose and desalting on Sephadex G-10).

**Figure S2**

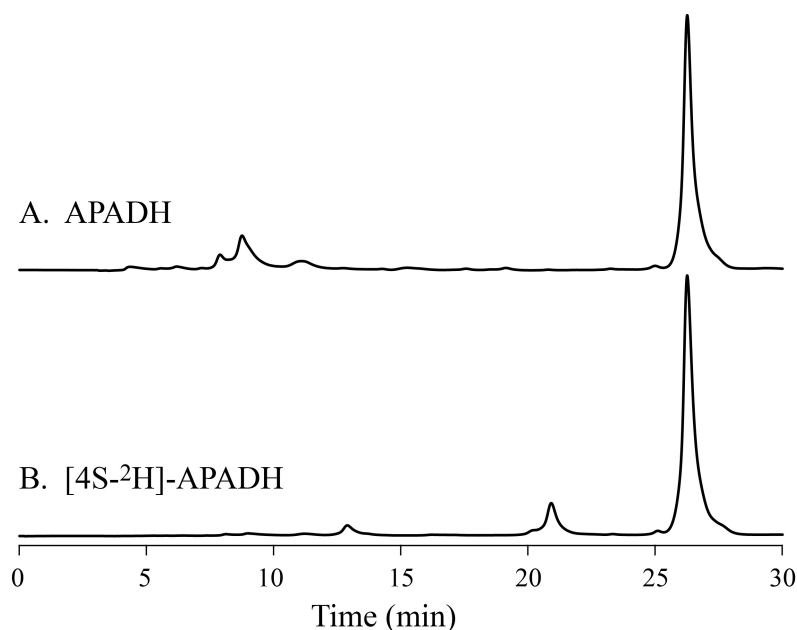

**HPLC analyses of APADH and [4S-<sup>2</sup>H]-APADH.** The 260 nm absorbance traces are shown for the elution of nucleotides from a 5  $\mu\text{m}$  Nucleosil C18 column (250 mm x 3.2 mm). Conditions: injection volume 20  $\mu\text{L}$ , 0.5  $\text{mL min}^{-1}$  flow rate, 0.1 M potassium phosphate (pH 6) containing 8 mM tetrabutylammonium hydrogen sulfate with a gradient of 20 to 40% methanol in 12 min, 40 to 100% methanol in an additional 16 min, then held at 100% methanol (1, 2). The samples are A) APADH (produced from APAD<sup>+</sup> by glucose dehydrogenase in the presence of glucose, followed by purification by ion exchange chromatography on Q sepharose and desalting using Sephadex G-10) and B) [4S-<sup>2</sup>H]-APADH (produced from APAD<sup>+</sup> by glucose dehydrogenase in the presence of glucose-d<sub>1</sub>, followed by purification by ion exchange chromatography on Q sepharose and desalting using Sephadex G-10).

**Figure S3**

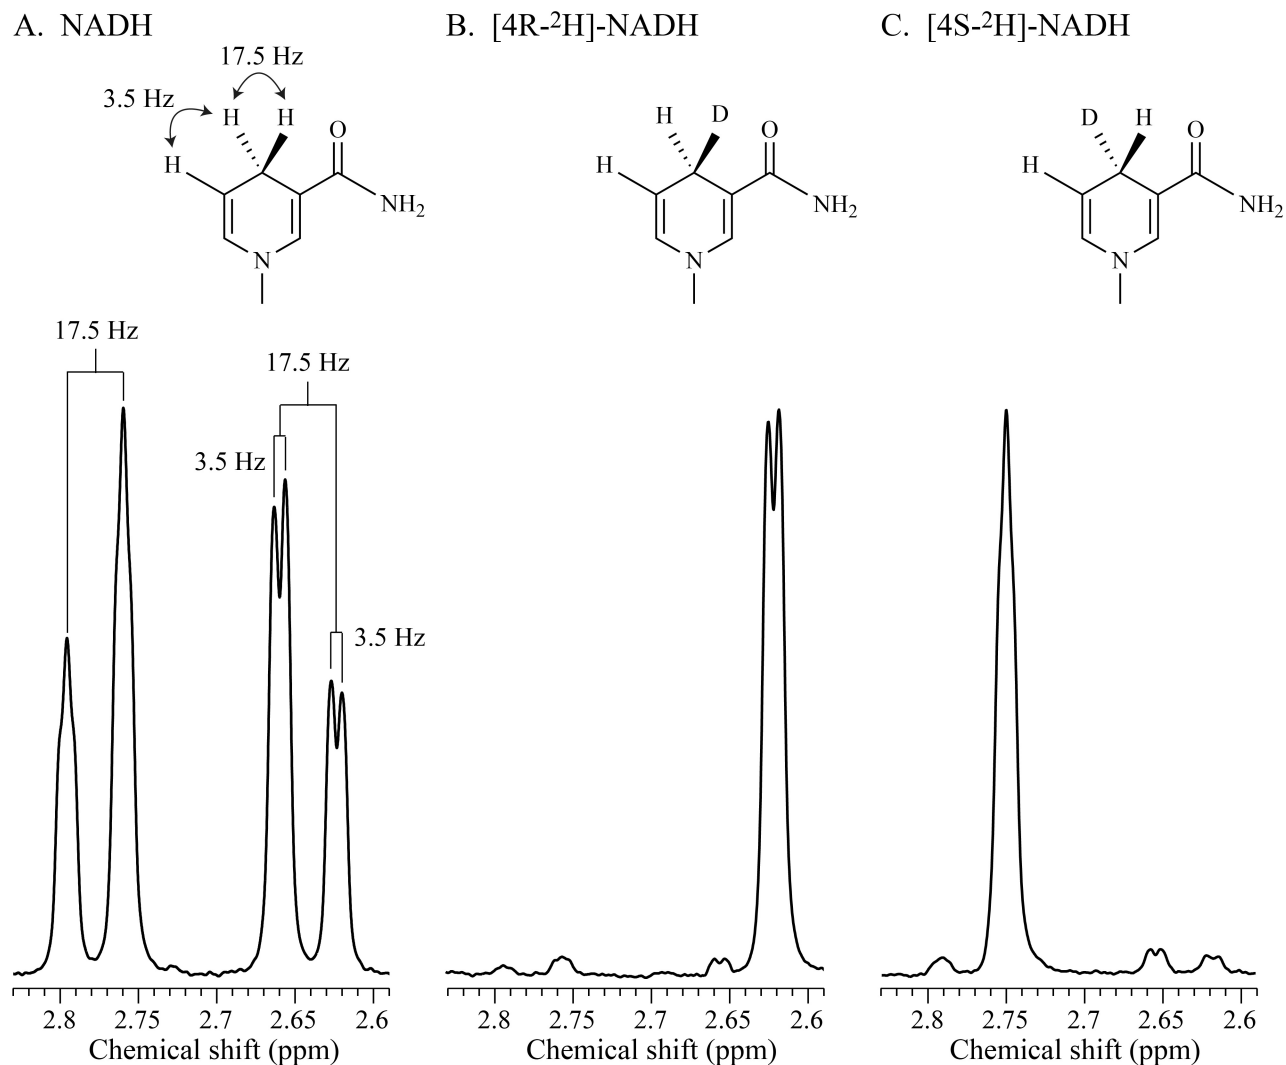

**NMR spectra of NADH, [4R-<sup>2</sup>H]-NADH and [4S-<sup>2</sup>H]-NADH.** The NMR spectral regions between 2.59 ppm and 2.83 ppm, containing the peaks from the C-4 protons of NADH (A), [4R-<sup>2</sup>H]-NADH (B) and [4S-<sup>2</sup>H]-NADH (C) are shown. The peak splittings are displayed on the NADH spectrum: the 17.5 Hz splittings are due to <sup>2</sup>J<sub>H-H</sub> (geminal) coupling between the two C-4 protons; the 3.5 Hz splittings are due to <sup>3</sup>J<sub>H-H</sub> (vicinal) coupling between the C-4S proton and the aromatic C-5 proton (3). Only the <sup>3</sup>J<sub>H-H</sub> (vicinal) coupling is observed in [4R-<sup>2</sup>H]-NADH and both couplings are absent in [4S-<sup>2</sup>H]-NADH; the low intensity split peaks probably represent contamination by NADH. Conditions: 100 μL of 2 mM nucleotide in 20 mM Tris-HCl (pH 7.7) + 10% D<sub>2</sub>O, measured on a Bruker DRX500 spectrometer at 500 MHz and 300 K. Chemical shifts are reported relative to TMS.

**Figure S4**

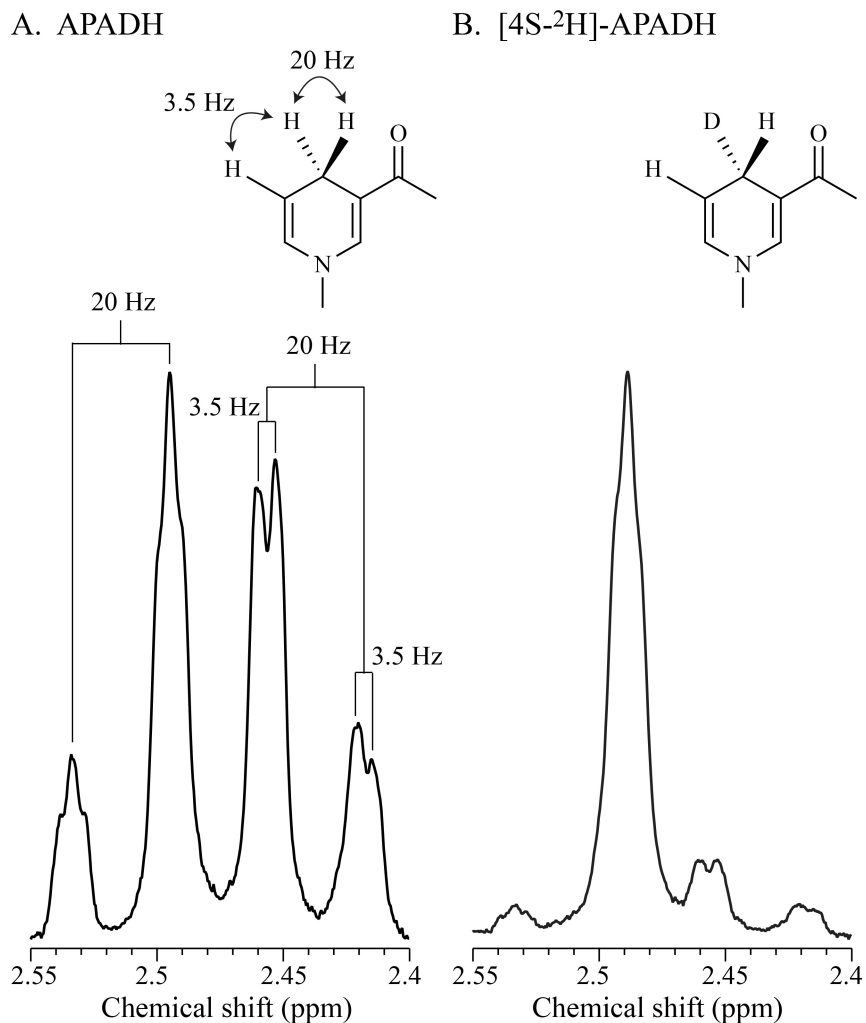

**NMR spectra of APADH and [4S-<sup>2</sup>H]-APADH.** The NMR spectral regions between 2.40 ppm and 2.55 ppm, containing the peaks from the C-4 protons of APADH (A) and [4S-<sup>2</sup>H]-APADH (B) are shown. The peak splittings are displayed on the APADH spectrum: the 20 Hz splittings are due to <sup>2</sup>J<sub>H-H</sub> (geminal) coupling between the two C-4 protons; the 3.5 Hz splittings are due to <sup>3</sup>J<sub>H-H</sub> (vicinal) coupling between the C-4S proton and the aromatic C-5 proton (3). Both couplings are absent in [4S-<sup>2</sup>H]-APADH, and the low intensity split peaks probably represent contamination by APADH. Conditions: 100 μL of 2 mM nucleotide in 20 mM Tris-HCl (pH 7.7) + 10% D<sub>2</sub>O, measured on a Bruker DRX500 spectrometer at 500 MHz and 300 K. Chemical shifts are reported relative to TMS.

## References

1. Stocchi, V., Cucchiaroni, L., Canestrari, F., Piacentini, M. P., and Fornaini, G. (1987) A very fast ion-pair reversed-phase HPLC method for the separation of the most significant nucleotides and their degradation products in human red blood cells. *Anal. Biochem.* 167, 181-190.
2. Yakovlev, G., and Hirst, J. (2007) Transhydrogenation reactions catalyzed by mitochondrial NADH-ubiquinone oxidoreductase (complex I). *Biochemistry* 46, 14250-14258.
3. Oppenheimer, N. J., Arnold, L. J., and Kaplan, N. O. (1971) A Structure of pyridine nucleotides in solution. *Proc. Natl. Acad. Sci. USA* 68, 3200-3205.
